# Supplementary material for: Novel poly(2-oxazoline)s with pendant l-prolinamide moieties as efficient organocatalysts for direct asymmetric aldol reaction
Source: Royal Society of Chemistry journal article supplement (doi:10.1039/c6cy00448b), 2016-01-01
Supplement: c6cy00448b1.pdf [file c6cy00448b1.pdf]

## Supporting Information

### **Novel poly(2-oxazoline)s with pendant L-prolinamide moieties as efficient organocatalysts for direct asymmetric aldol reaction**

Yao Wang, Huifang Shen, Le Zhou, Fangyu Hu, Shoulei Xie and Liming Jiang\*

MOE Key Laboratory of Macromolecular Synthesis and Functionalization,

Department of Polymer Science and Engineering,

Zhejiang University, Hangzhou 310027, China

Correspondence to: L. Jiang (E-mail: [cejlm@zju.edu.cn](mailto:cejlm@zju.edu.cn))

## 1. Monomer synthesis

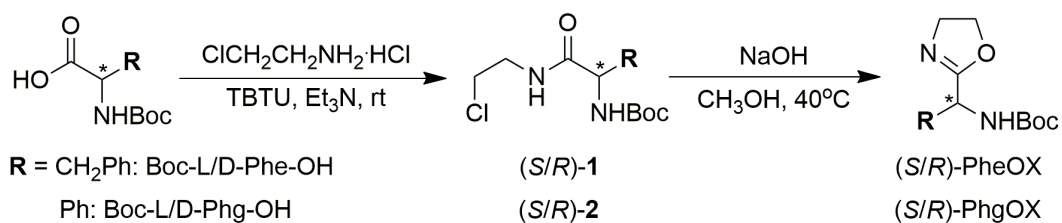

## 2. Spectroscopic data

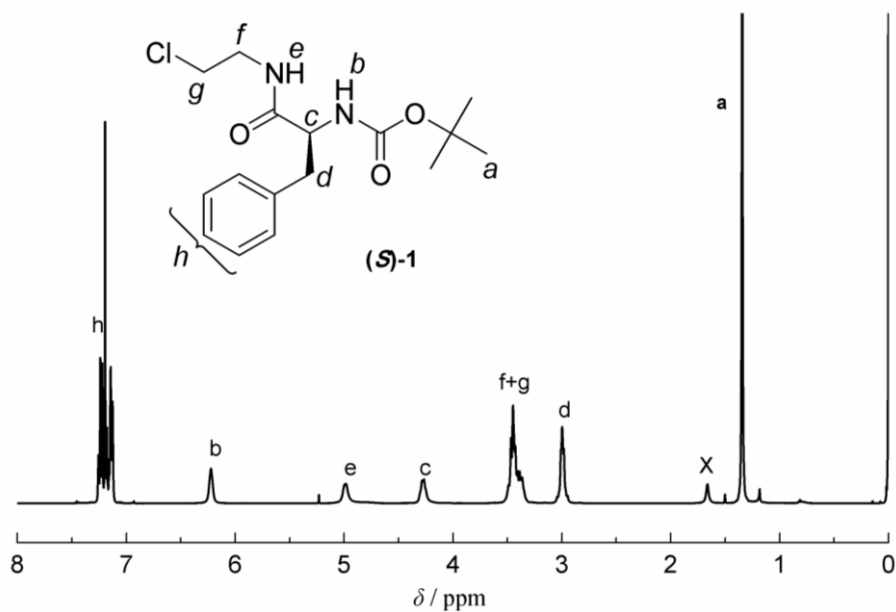

Figure S1.  $^1\text{H}$  NMR of the intermediate product (S)-1

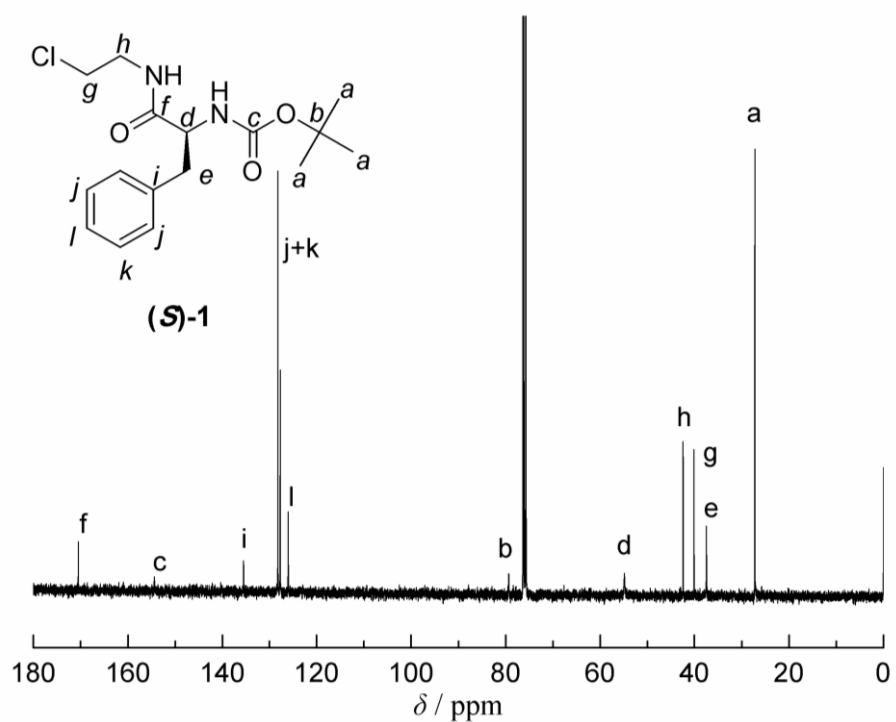

Figure S2.  $^{13}\text{C}$  NMR spectrum of the intermediate product (S)-1

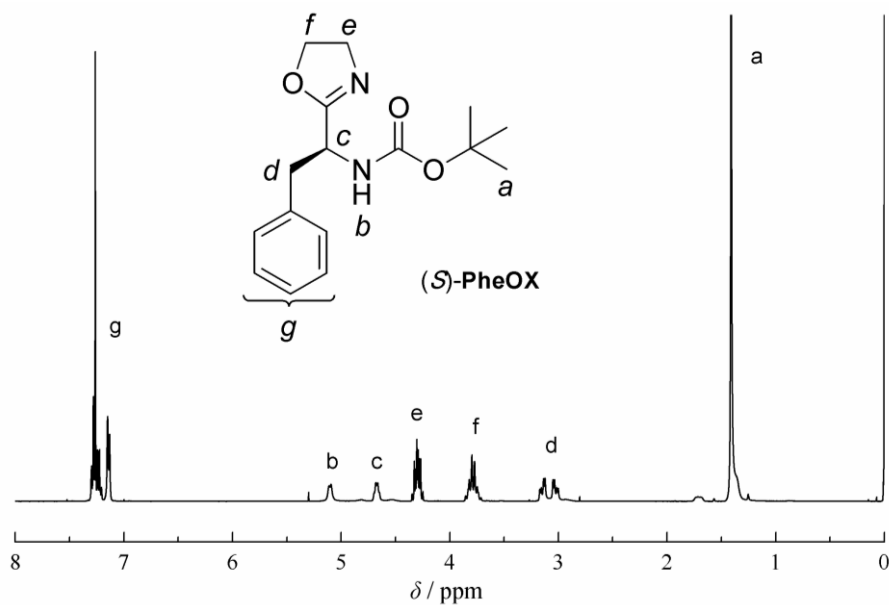

**Figure S3.**  $^1\text{H}$  NMR spectrum of (*S*)-PheOX

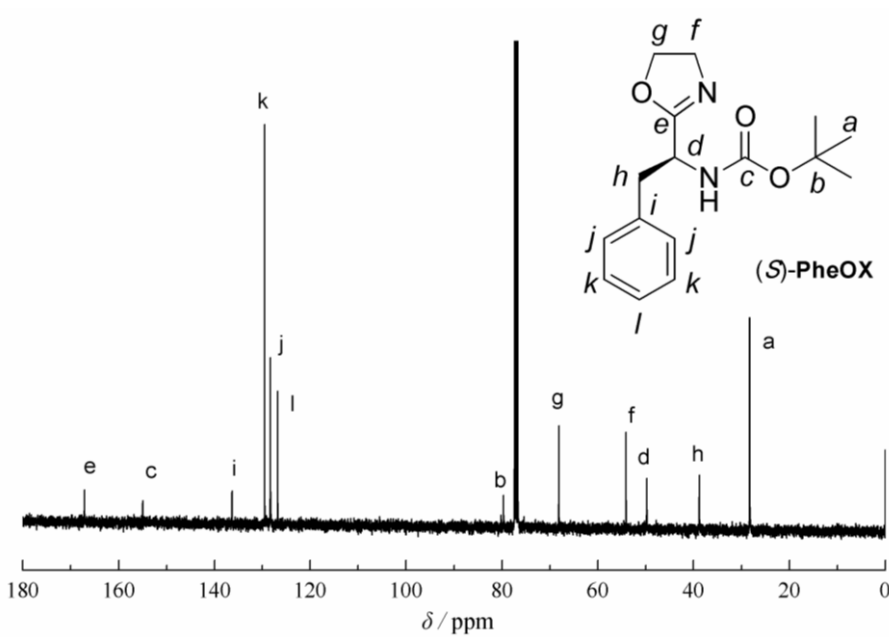

**Figure S4.**  $^{13}\text{C}$  NMR spectrum of (*S*)-PheOX

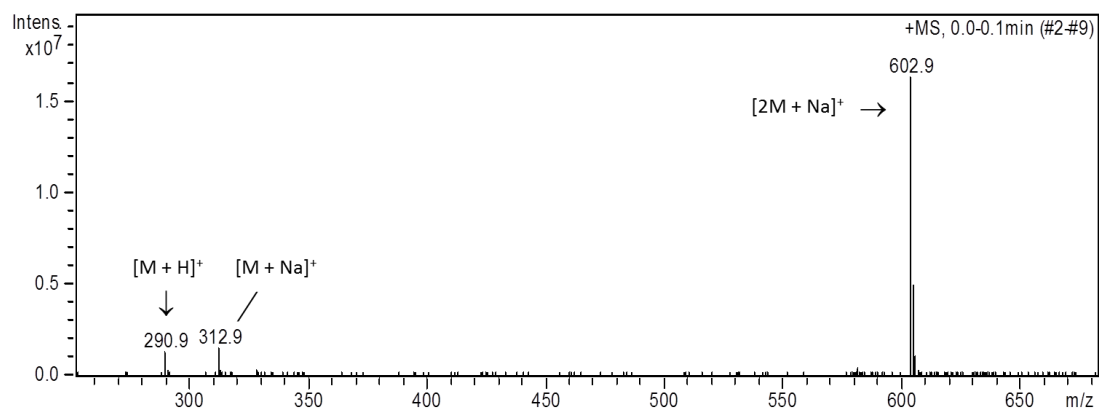

**Figure S5.** MS (ESI+) of (*S*)-PheOX

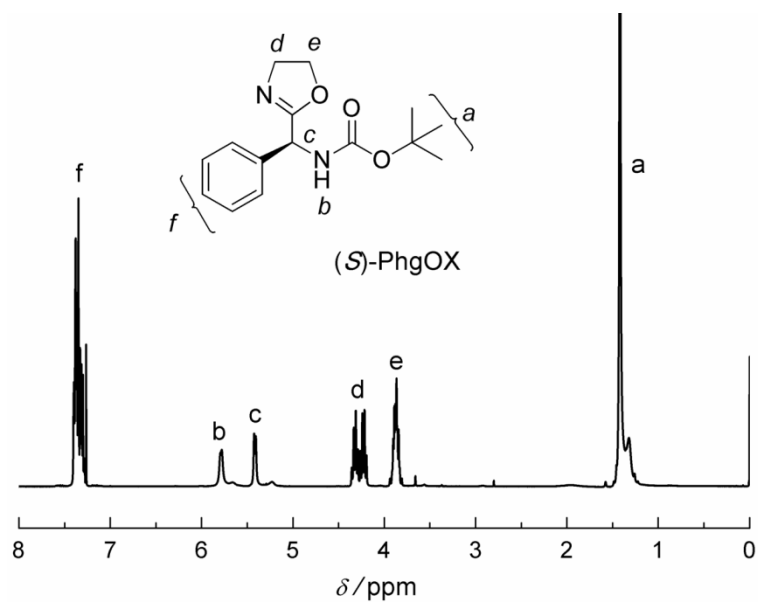

**Figure S6.** <sup>1</sup>H NMR spectrum of (S)-PhgOX

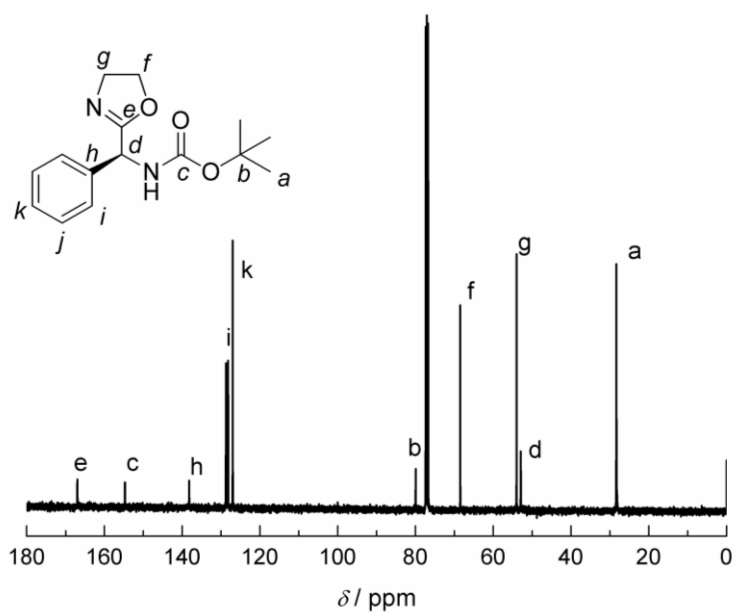

**Figure S7.** <sup>13</sup>C NMR spectrum of (S)-PhgOX

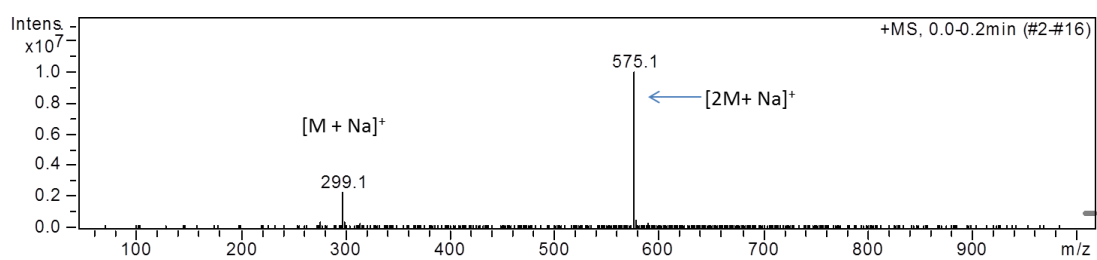

**Figure S8.** MS (ESI+) of (S)-PhgOX

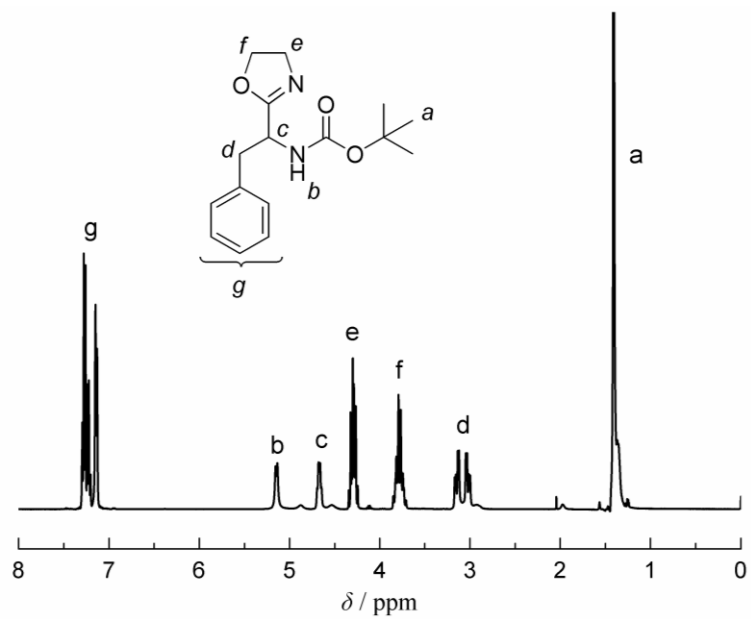

**Figure S9.**  $^1\text{H}$  NMR spectrum of  $(RS)$ -PheOX

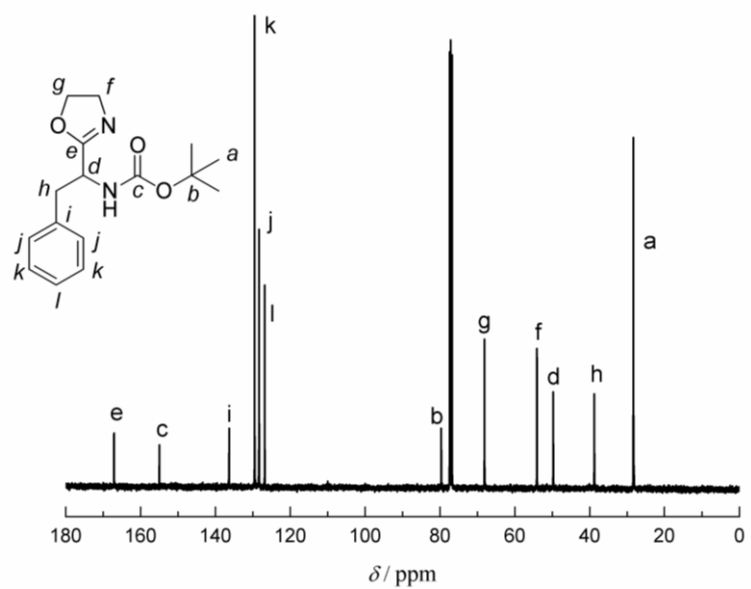

**Figure S10.**  $^{13}\text{C}$  NMR spectrum of  $(RS)$ -PheOX

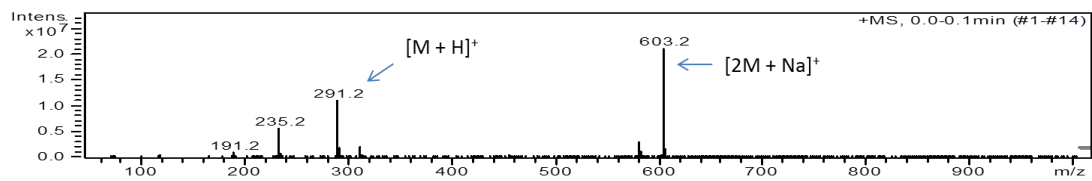

**Figure 11.** MS (ESI+) of  $(RS)$ -PheOX

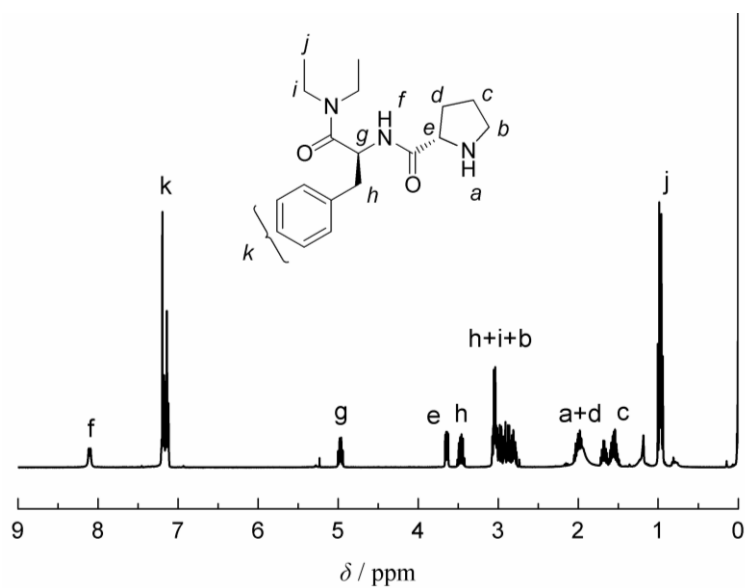

**Figure S12.**  $^1\text{H}$  NMR spectrum of the model compound (*S*)-M1

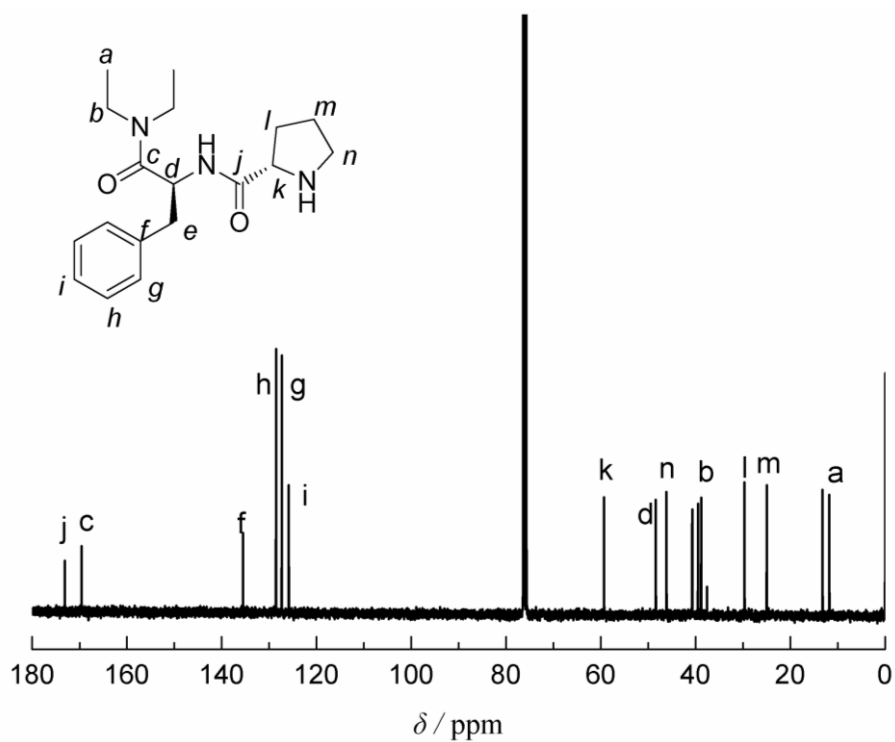

**Figure S13.**  $^{13}\text{C}$  NMR spectrum of (*S*)-M1

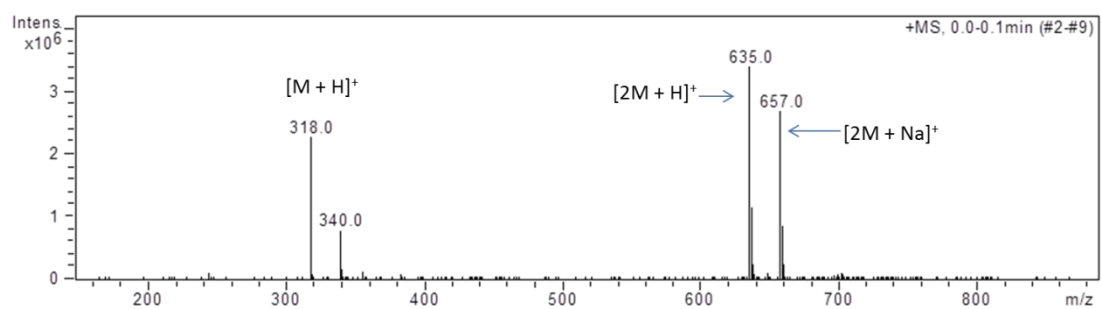

**Figure S14.** MS (ESI+) of (*S*)-M1

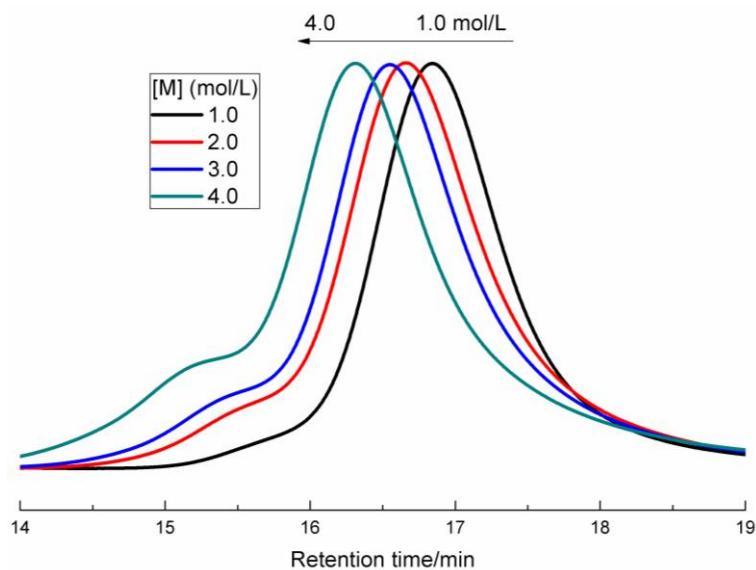

**Figure S15.** SEC traces of (S)-PPheOX<sub>NHBoc</sub> samples, PMMA standard, DMF with 50 mM LiBr as the eluent. Polymerization conditions:  $[M]_0 = 1\sim 4.0$  M,  $[M]_0/[I]_0 = 100$ , acetonitrile, using Sc(OTf)<sub>3</sub> as the initiator, 90°C, 2 h.

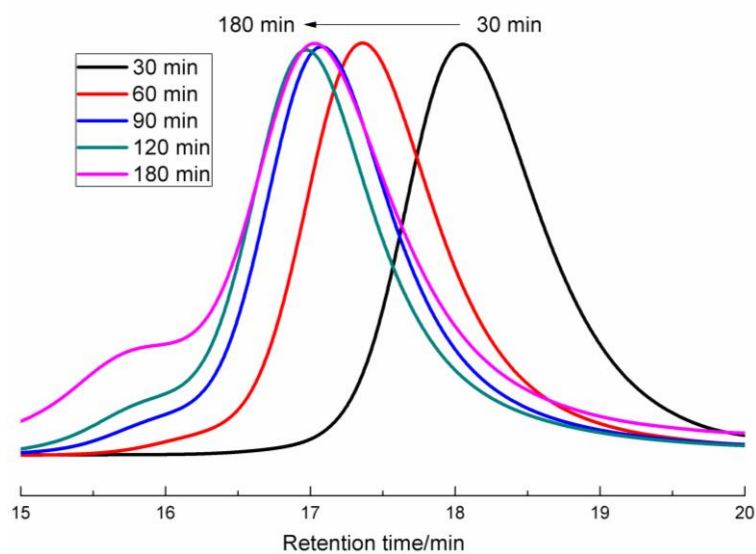

**Figure S16.** SEC traces of (S)-PPheOX<sub>NHBoc</sub> samples collected periodically from the polymerization kinetic experiments, PMMA standard, DMF with 50 mM LiBr as the eluent. Polymerization conditions:  $[M]_0 = 2$  M,  $[M]_0/[I]_0 = 100$ , acetonitrile, using Sc(OTf)<sub>3</sub> as the initiator, reaction temperature: 90°C.

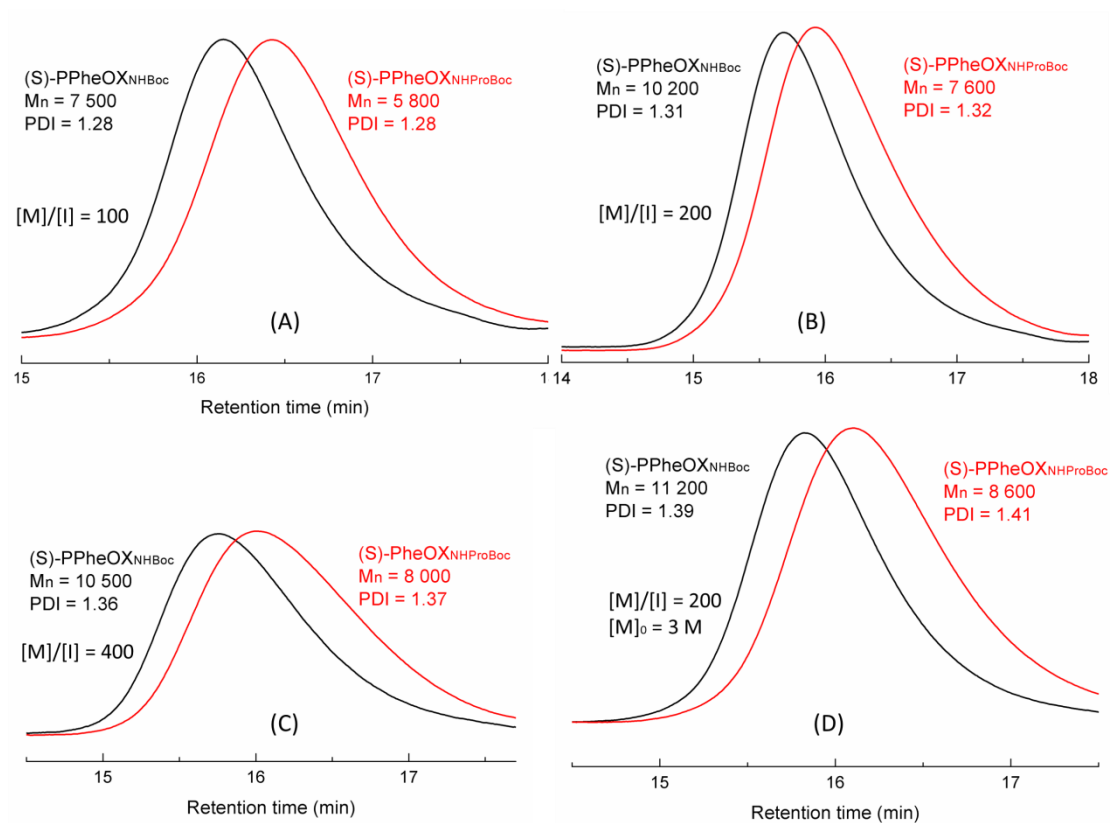

**Figure S17.** Comparison of SEC traces of (S)-PPheOX<sub>NHBoc</sub> and (S)-PPheOX<sub>NHProBoc</sub>. (A), (B), C, and D correspond to Entries 2–5 in Table 1, respectively.

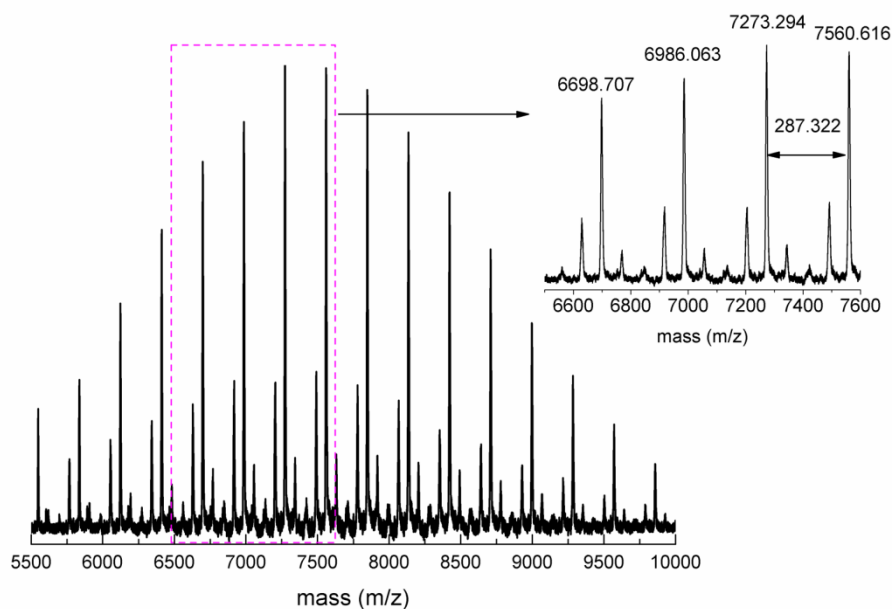

**Figure S18.** A representative MALDI-ToF MS of (S)-PPheOX<sub>NHPro</sub>.



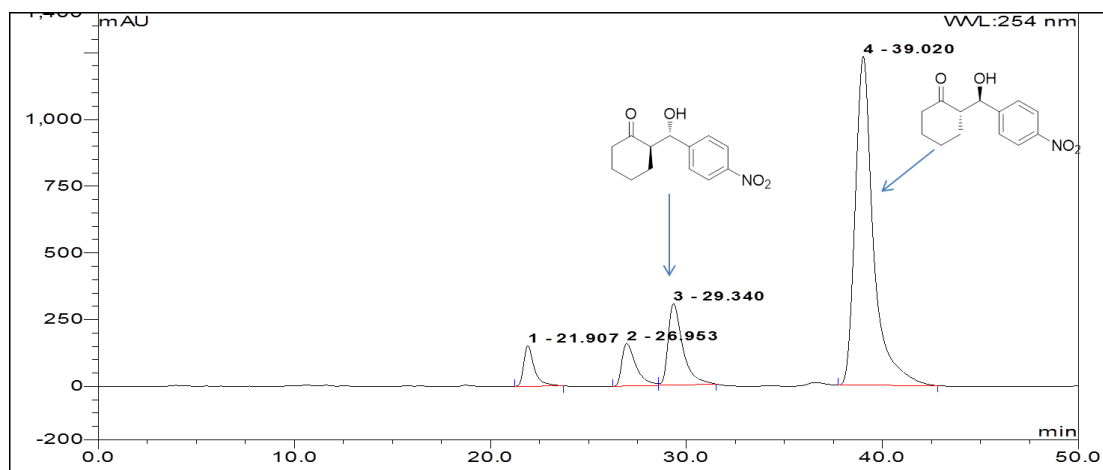

| No.           | Ret.Time/min | Peak Name | Height/ mAU | Area/ mAU*min | Rel.Area/% |
|---------------|--------------|-----------|-------------|---------------|------------|
| 1             | 21.91        | 1#        | 151.894     | 95.055        | 5.22       |
| 2             | 26.95        | 2#        | 159.086     | 132.068       | 7.25       |
| 3             | 29.34        | 3#        | 305.176     | 262.831       | 14.43      |
| 4             | 39.02        | 4#        | 1231.101    | 1331.268      | 73.10      |
| <b>Total:</b> |              |           | 1847.256    | 1821.222      | 100.00     |

**Figure S19.** Representative HPLC curve of aldol products of cyclohexanone with 4-nitrobenzaldehyde and the corresponding analysis data.

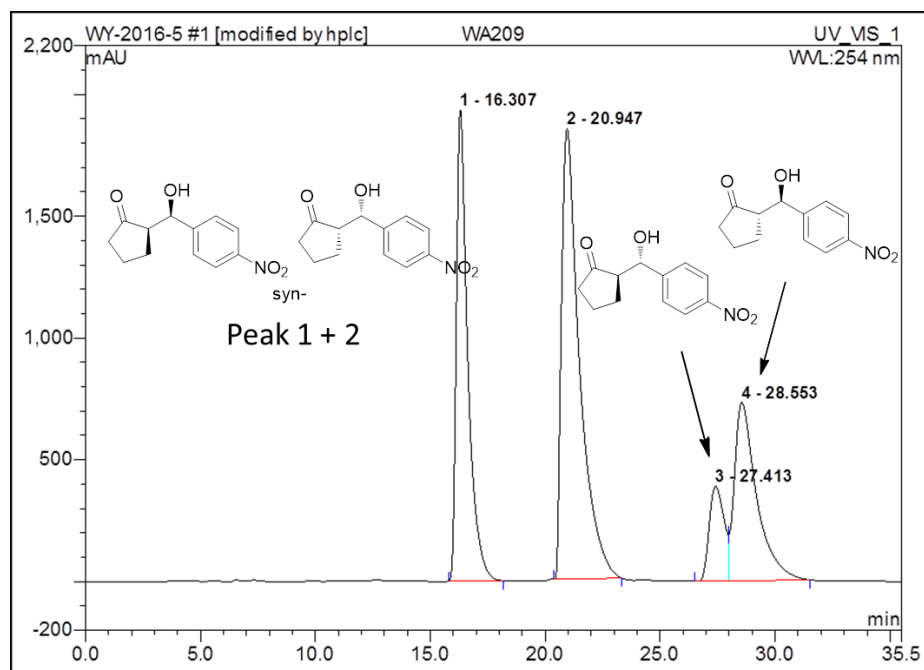

| No.           | Ret.Time<br>min | Peak Name | Height<br>mAU | Area<br>mAU*min | Rel.Area<br>% |
|---------------|-----------------|-----------|---------------|-----------------|---------------|
| 1             | 16.31           | 1#        | 1934.904      | 1110.879        | 28.44         |
| 2             | 20.95           | 2#        | 1849.659      | 1682.576        | 43.07         |
| 3             | 27.41           | 3#        | 389.444       | 289.231         | 7.40          |
| 4             | 28.55           | 4#        | 732.105       | 823.675         | 21.09         |
| <b>Total:</b> |                 |           | 4906.111      | 3906.361        | 100.00        |

**Figure S20.** Representative HPLC curve of aldol products of cyclopentanone with 4-nitrobenzaldehyde and the corresponding analysis data.

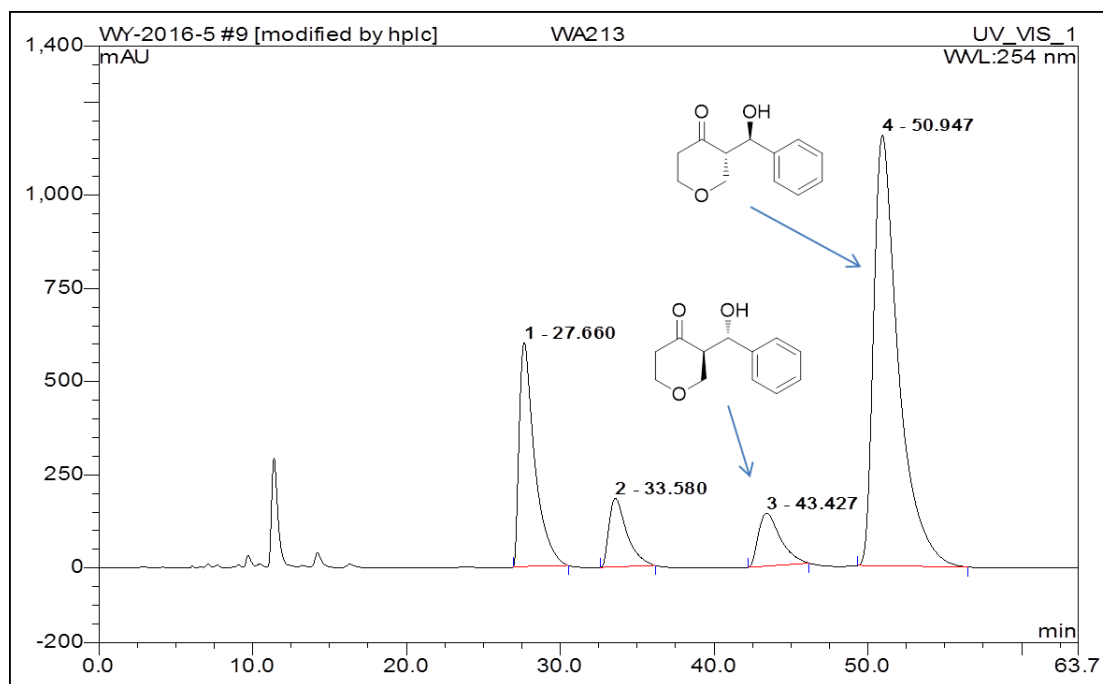

| No.           | Ret.Time<br>min | Peak Name | Height<br>mAU | Area<br>mAU*min | Rel.Area<br>% |
|---------------|-----------------|-----------|---------------|-----------------|---------------|
| 1             | 27.66           | 1#        | 600.274       | 701.190         | 21.02         |
| 2             | 33.58           | 2#        | 184.272       | 247.817         | 7.43          |
| 3             | 43.43           | 3#        | 141.953       | 235.589         | 7.06          |
| 4             | 50.95           | 4#        | 1155.043      | 2151.849        | 64.50         |
| <b>Total:</b> |                 |           | 2081.542      | 3336.446        | 100.00        |

**Figure S21.** Representative HPLC curve of aldol products of 4-pyranone with 4-nitrobenzaldehyde and the corresponding analysis data.

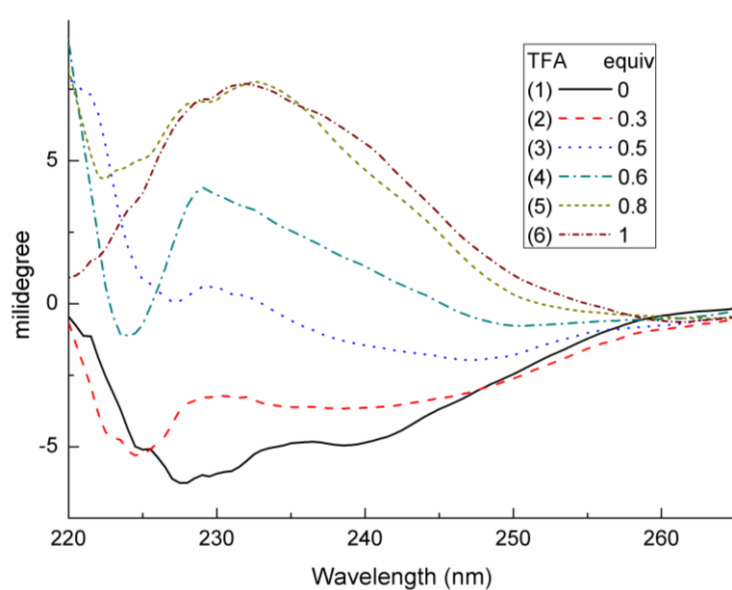

**Figure S22.** CD titration of (*RS*)-PPheOX<sub>NHPro</sub> ( $10^{-3}$  M) with TFA (0 ~ 1 equiv.) in CH<sub>2</sub>Cl<sub>2</sub> containing ~1% water at 25°C.

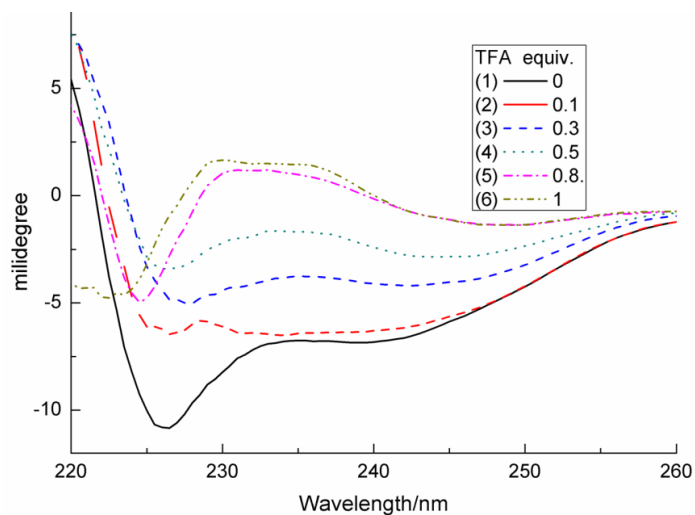

**Figure 23.** CD titration of (*S*)-M1 with TFA (0 ~ 1 equiv.) in CH<sub>2</sub>Cl<sub>2</sub> containing ~1% water at 25°C.

**Table S1** Results on the cationic ring-opening polymerization of 2-oxazolines and the post-modification for the resulting polymers <sup>a</sup>

| <b>POX<sub>NHBoc</sub></b> | <b>M/I</b> | <b>Yield (%)<sup>b</sup></b> | <b>M<sub>n</sub><sup>c</sup> (10<sup>3</sup>)</b> | <b>PDI<sup>c</sup></b> | <b>POX<sub>NHPro</sub></b>           | <b>E<sub>NHPro</sub><sup>d</sup></b> | <b>[α]<sub>D</sub><sup>20e</sup></b> |
|----------------------------|------------|------------------------------|---------------------------------------------------|------------------------|--------------------------------------|--------------------------------------|--------------------------------------|
| <i>(R)</i> -P1             | 100        | 90                           | 6.7                                               | 1.13                   | <i>(R)</i> -PPheOX <sub>NHPro</sub>  | 97                                   | -30                                  |
|                            | 200        | 83                           | 10.0                                              | 1.09                   |                                      | 95                                   | -30                                  |
| <i>(RS)</i> -P1            | 100        | 92                           | 7.6                                               | 1.09                   | <i>(RS)</i> -PPheOX <sub>NHPro</sub> | 95                                   | -26                                  |
|                            | 200        | 75                           | 10.1                                              | 1.1                    |                                      | 95                                   | -28                                  |
| <i>(S)</i> -P2             | 100        | 87                           | 5.7                                               | 1.16                   | <i>(S)</i> -PPhgOX <sub>NHPro</sub>  | 97                                   | -31                                  |
|                            | 200        | 75                           | 9.2                                               | 1.11                   |                                      | 98                                   | -32                                  |
| <i>(R)</i> -P2             | 100        | 90                           | 5.9                                               | 1.15                   | <i>(R)</i> -PPhgOX <sub>NHPro</sub>  | 96                                   | -35                                  |
|                            | 200        | 71                           | 8.3                                               | 1.12                   |                                      | 98                                   | -39                                  |

<sup>a</sup> Polymerization conditions: [M] = 2 mol/L, CH<sub>3</sub>CN, 90°C, 3 h. <sup>b</sup> Isolated yield. <sup>c</sup> Determined by SEC measurements, PS calibration, THF as the eluent. <sup>d</sup> Amide coupling efficiency of repeating monomeric units was measured by <sup>1</sup>H NMR integration (CDCl<sub>3</sub>). <sup>e</sup> c = 10 mg/mL, MeOH, 20°C. *(R)*-P1 = *(R)*-PPheOX<sub>NHBoc</sub>, *(RS)*-P1 = *(RS)*-PPheOX<sub>NHBoc</sub>, *(S)*-P2 = *(S)*-PPhgOX<sub>NHBoc</sub>, *(R)*-P2 = *(R)*-PPhgOX<sub>NHBoc</sub>. The corresponding monomers are *(R)*-PheOX, *(RS)*-PheOX, *(S)*-PhgOX, and *(R)*-PhgOX, respectively.

**Table S2** Effect of solvent on the direct asymmetric aldol reaction of cyclohexanone with 4-nitrobenzaldehyde in the presence of polymeric catalyst (*S*)-PPheOX<sub>NHPrO</sub><sup>a</sup>

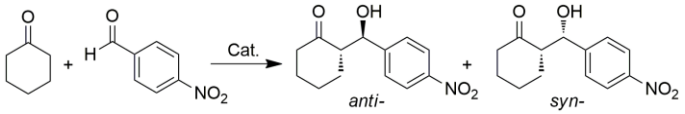

| Entry          | Loading <sup>b</sup><br>[mol-%] | Solvent (total 1 mL)        | Time<br>[h] | Yield <sup>c</sup><br>[%] | anti:syn <sup>d</sup> | ee <sup>e</sup> |
|----------------|---------------------------------|-----------------------------|-------------|---------------------------|-----------------------|-----------------|
| 1              | 20                              | MeOH or DMSO or NMP         | 48          | <5                        | –                     | –               |
| 2              | 20                              | H <sub>2</sub> O            | 12          | 82                        | 81:19                 | 65              |
| 3              | 10                              | MeOH/H <sub>2</sub> O (1:1) | 36          | 85                        | 72:28                 | 45              |
| 4              | 20                              | MeOH/H <sub>2</sub> O (1:1) | 12          | 72                        | 79:21                 | 74              |
| 5              | 10                              | NMP/H <sub>2</sub> O (1:1)  | 12          | 95                        | 88:12                 | 68              |
| 6              | 20                              | NMP/H <sub>2</sub> O (1:1)  | 12          | 98                        | 83:17                 | 80              |
| 7              | 20                              | DMSO/H <sub>2</sub> O (1:1) | 24          | 82                        | 81:19                 | 60              |
| 8 <sup>f</sup> | 20                              | none                        | 48          | <5                        | –                     | –               |

<sup>a</sup> Reaction conditions: aldehyde (0.25 mmol), cyclohexanone (5 mmol, 0.516 mL), 10°C. <sup>b</sup> Catalyst 20 mol-% or 10 mol-% in the repeating units. <sup>c</sup> Isolated yield. <sup>d</sup> Determined by <sup>1</sup>H NMR spectroscopic analysis of the crude product. <sup>e</sup> Determined by HPLC using a chiral column; *ee* values are referred to the major isomer. <sup>f</sup> In this case, cyclohexanone served as solvent.

**Table S3** Effect of the molar mass on the catalytic activity of (*S*)-PPheOX<sub>NHPrO</sub> in the direct aldol reaction.

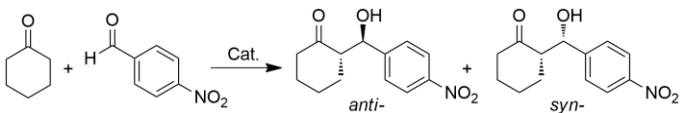

| Entry | <i>M</i> <sub>n</sub> | H <sub>2</sub> O/TFA(μL) | Time (h) | Yield <sup>b</sup> (%) | anti/syn <sup>c</sup> | ee <sup>d</sup> (%) |
|-------|-----------------------|--------------------------|----------|------------------------|-----------------------|---------------------|
| 1     | 4000                  | 9:2                      | 12       | 92                     | 80/20                 | 92                  |
| 2     | 4000                  | 9:2.6                    | 24       | 70                     | 80/20                 | 93                  |
| 3     | 6700                  | 9:2                      | 12       | 96                     | 78/22                 | 91                  |
| 4     | 6700                  | 9:2.6                    | 24       | 66                     | 71/29                 | 93                  |
| 5     | 9000                  | 9:2                      | 12       | 98                     | 84/16                 | 89                  |

|   |       |       |    |    |       |    |
|---|-------|-------|----|----|-------|----|
| 6 | 9000  | 9:2.6 | 24 | 68 | 77/23 | 92 |
| 7 | 10400 | 9:2   | 12 | 97 | 78/22 | 88 |
| 8 | 10400 | 9:2.6 | 24 | 64 | 83/17 | 89 |

---
